# Supplementary material for: Antimicrobial and cytotoxic effects of marine sponge extracts Agelas clathrodes, Desmapsamma anchorata and Verongula rigida from a Caribbean Island
Source: PeerJ. 2022 Sep 23;10:e13955. doi: 10.7717/peerj.13955 (PMC9512013; doi:10.7717/peerj.13955)
Supplement: Supplemental Information 2 — Cytotoxicity analysis of our sponge species on three cancer cell lines by luminescence measurement: MDA-MB-231, MOLM-14, HL-60 and RES259. Luminescence measurements are expressed as RLU (Relative Light Unit). [file peerj-10-13955-s002.xlsx]

## Sheet: MDA-MB-231
p2017007-01 : Agelas clathrodes
RLU- Noise
[µg/ml]	Experiment 1			[µg/ml]	Experiment 2			Experiment 3
500	-30428	-30450	-27391	100	-46464	-44548	-41805	-38965	-37728	-34962
166.667	-17174	-21584	-16734	25	-22297	-14844	-10422	-1710	3639	13639
55.5556	-6486	-17339	-8514	6.25	2198721	2471277	2419338	2423897	2527118	2581511
18.5185	6291	-5391	6003	1.5625	2625957	2819066	2912507	3049361	2996885	3076072
6.17284	950441	505471	1197846	0.390625	2796514	3274283	3224680	3372837	3308434	3518629
0.61	3945668	4108043	4228155	0.0976562	2900268	3024668	3118461	3092806	3270091	3288316
0.06	4097638	4201021	4496455	0.0244141	2766565	3230381	3236429	3139610	3209491	3294369
DMSO	3796892	3967929	4230147	DMSO	2890429	3008205	2851255	2890429	3008205	2851255
p2017007-04: Verongula rigida
RLU- Noise
[µg/ml]	Experiment 1			[µg/ml]	Experiment 2			Experiment 3
500	-30881	-34906	-37211	100	-19193	221164	191592	1077856	911247	687725
166.667	-11558	4633	-7026	25	1825493	1956723	1855109	2756081	2676667	2285963
55.5556	679413	591645	674205	6.25	2671298	2770298	2667415	3195913	3176191	2888922
18.5185	2487347	2262839	2100571	1.5625	3200666	3110436	3223645	3183462	3155224	2762925
6.17284	3264516	3302042	3233350	0.390625	3292175	3295032	3178339	3213478	3239151	2945005
0.61	4425756	4329140	4037001	0.0976562	3114484	2980632	3064847	3283745	3224789	2964550
0.06	4298876	4409616	4082716	0.0244141	3307140	3477270	3301313	3212285	3230353	3080037
DMSO	3796892	3967929	4230147	DMSO	2953831	3158404	3075105	2953831	3158404	3075105
Desmapsamma anchorata: p2017007-06bis
RLU- Noise
[µg/ml]	Experiment 1			[µg/ml]	Experiment 2			Experiment 3
500	3362541	3522855	3276369	100	1779767	2482236	2720386	2590645	2490642	2738453
166.667	2983996	3199532	3316920	25	2885402	3252198	3240828	2942218	2936728	3182276
55.5556	3413163	3624288	3475911	6.25	3024724	3299452	3208569	3305590	3313651	3383329
18.5185	3524481	3854726	3617282	1.5625	2954948	3339571	3406692	3390712	3310449	3442462
6.17284	3755296	3765231	4198339	0.390625	2998754	3454974	3405029	3655151	3525504	3655238
0.61	3783229	4055577	4125431	0.0976562	3052198	3294164	3363655	3292640	3408981	3400946
0.06	4286450	4201444	4490435	0.0244141	2953303	3321707	3337143	3260169	3273421	3327800
DMSO	4149012	4165809	4023023	DMSO	3158322	2984288	3182706	3158322	2984288	3182706
Doxorubicine
µg/ml	Experiment 1			µg/ml	Experiment 2
10.8704	839531	785561	848637	10.87	408902	414266	271384
3.62347	645732	781903	789966	2.7175	545752	514984	457334
1.20782	609284	803594	687202	0.679375	520265	501188	322346
0.402607	728597	698007	758949	0.169844	1599562	1526454	1422195
0.134203	1974634	1954041	2083542	0.042461	2596922	2282866	2155321
0.0447342	2633861	2655113	2322985	0.010615	3102569	2968641	2861774
0.0149114	3261883	3185698	3207354	0.002654	3249110	3365860	2629574
0.00497046	3322481	3322128	3256654	DMSO	2980092	3066709	2852784

## Sheet: MOLM-14
p2017007-01 : Agelas clathrodes
RLU- Noise
[µg/ml]	Experiment 1			[µg/ml]	Experiment 2			Experiment 3
500	-10800.8	-10971.8	-10544.8	100	-51963.3	-50745.3	-48617.3	-47995.3	-46817.3	-45654.3
166.667	-9653.75	-9982.75	-8977.75	25	-47984.3	-45401.3	-41729.3	-39784.3	-37010.3	-33588.3
55.556	-8159.75	-8404.75	-6295.75	6.25	-25626.3	-22264.3	-12638.3	-9739.33	-6804.33	3477.67
18.519	-3465.75	-5144.75	100.25	1.5625	5.26869e+06	4.17167e+06	4.25781e+06	3.45364e+06	3.20676e+06	3.63426e+06
6.173	14216.2	1722.25	9041.25	0.390625	6.89236e+06	8.2242e+06	7.92405e+06	7.57086e+06	7.39774e+06	7.54585e+06
2.058	388211	62963.2	52289.2	0.0976562	7.31975e+06	8.40878e+06	8.75559e+06	8.723e+06	8.69879e+06	9.09322e+06
0.21	4.90109e+06	2.28499e+06	2.23006e+06	0.0244141	7.50332e+06	8.07716e+06	7.65445e+06	7.95102e+06	7.48188e+06	7.80243e+06
0.021	2.76605e+06	2.45773e+06	2.87882e+06	DMSO	8.4882e+06	9.06584e+06	8.15685e+06	8.4882e+06	9.06584e+06	8.15685e+06
DMSO	3.34628e+06	3.00783e+06	3.03323e+06
p2017007-04: Verongula rigida
RLU- Noise
[µg/ml]	Experiment 1			[µg/ml]	Experiment 2			Experiment 3
500	-11318.8	-10102.8	-2083.75	100	-45134.3	-41696.3	-38153.3	-27801.3	-21491.3	-23164.3
166.667	-8992.75	-7136.75	2545.25	25	-21749.3	101304	412190	3.13236e+06	3.62397e+06	3.51008e+06
55.556	-2796.75	-276.75	9734.25	6.25	3.85818e+06	3.69018e+06	3.6608e+06	5.85899e+06	6.29933e+06	5.34188e+06
18.519	717567	768477	875042	1.5625	6.01132e+06	5.54519e+06	5.53931e+06	7.92815e+06	7.83471e+06	6.473e+06
6.173	1.56807e+06	1.43917e+06	1.52719e+06	0.390625	7.98149e+06	7.20191e+06	6.71595e+06	8.15506e+06	7.70682e+06	6.78474e+06
2.058	1.69161e+06	1.72984e+06	1.78846e+06	0.0976562	8.30844e+06	8.1781e+06	8.01783e+06	8.15171e+06	7.40681e+06	6.7005e+06
0.21	2.47649e+06	2.37662e+06	2.43268e+06	0.0244141	8.2624e+06	6.52994e+06	6.55433e+06	6.87538e+06	6.57934e+06	5.25689e+06
0.021	2.70006e+06	2.75966e+06	2.78566e+06	DMSO	9.05395e+06	8.7418e+06	8.27311e+06	9.05395e+06	8.7418e+06	8.27311e+06
DMSO	3.34628e+06	3.00783e+06	3.03323e+06
Desmapsamma anchorata: p2017007-06bis
RLU- Noise
[µg/ml]	Experiment 1			[µg/ml]	Experiment 2			Experiment 3
500	2.58908e+06	1.17574e+06		100	4.99842e+06	4.34184e+06	5.97278e+06	1.82906e+06	1.67865e+06	1.59175e+06
166.667	3.12841e+06	3.08831e+06		25	6.49876e+06	6.38047e+06	7.37756e+06	5.77115e+06	5.46948e+06	5.55904e+06
55.556	3.02704e+06	3.32534e+06		6.25	5.93214e+06	7.75382e+06	8.02852e+06	8.00835e+06	7.75205e+06	8.43866e+06
18.519	3.01963e+06	3.09731e+06		1.5625	5.74787e+06	6.87733e+06	7.23078e+06	7.81494e+06	7.16611e+06	7.66992e+06
6.173	3.29658e+06	3.343e+06		0.390625	5.92006e+06	7.57676e+06	6.96753e+06	7.17793e+06	7.22524e+06	7.12477e+06
2.058	2.79696e+06	2.94794e+06		0.0976562	7.2189e+06	7.07276e+06	7.49522e+06	7.90602e+06	7.91449e+06	7.78397e+06
0.21	2.85636e+06	2.64121e+06		0.0244141	6.03037e+06	7.42796e+06	7.80072e+06	8.42137e+06	7.97902e+06	8.50486e+06
0.021	3.04096e+06	2.94772e+06		DMSO	7.37502e+06	7.38439e+06	7.74335e+06	7.37502e+06	7.38439e+06	7.74335e+06
ARAC
µg/ml	Experiment 1			µg/ml	Experiment 2
4.864	43836.4	26339.4		4.864	-24704.7	-38792.7	-43842.7
1.6214	51892.4	35881.4		1.6214	-2380.67	-29634.7	-36222.7
0.540467	190841	146172		0.540467	27332.3	-2775.67	-7402.67
0.180156	859725	676502		0.180156	3.09323e+06	5.81355e+06	6.12468e+06
0.0600518	2.05104e+06	1.86061e+06		0.0600518	6.87478e+06	7.47231e+06	7.0426e+06
0.0200173	2.1124e+06	2.05798e+06		0.0200173	6.89863e+06	7.09828e+06	7.55972e+06
0.00667243	2.2757e+06	2.29025e+06		0.00667243	7.35307e+06	7.18293e+06	7.43993e+06
0.00222414	2.52717e+06	2.53156e+06		0.00222414	7.6001e+06	7.46475e+06	7.92186e+06
DMSO	2.82069e+06	2.77719e+06	2.54288e+06	DMSO	7.37502e+06	7.38439e+06	7.74335e+06

## Sheet: HL-60
p2017007-01 : Agelas clathrodes
RLU- Noise
[µg/ml]	Experiment 2			Experiment 3
100	-21444	-20915	-20159	-19691	-19070	-18489
25	-19910	-18858	-17492	-15518	-13679	-11708
6.25	9932	23800	24342	120981	184899	160015
1.5625	833444	844204	977219	1174621	1050299	1061697
0.390625	1324787	1342256	1522644	1300837	1361288	1430295
0.0976562	1413738	1313864	1304289	1375643	1283248	1308960
0.0244141	1129052	1238020	1379753	1381099	1411024	1434510
DMSO	1563975	1435423	1546526	1563975	1435423	1546526
p2017007-04: Verongula rigida
RLU- Noise
[µg/ml]	Experiment 2			Experiment 3
100	-17053	-13811	-11810	21668	43832	18098
25	124836	392736	499187	1119718	1154677	1411705
6.25	1168683	1023273	1020147	1240712	1288022	1590949
1.5625	1272807	1253902	1231471	1172531	1260815	1339580
0.390625	1334925	1382529	1310514	1202124	1284500	1658335
0.0976562	1255361	1196372	1292162	1408877	1385867	2052834
0.0244141	1375527	1441418	1413607	1235719	1287568	1499145
DMSO	1501650	1511461	1206883	1501650	1511461	1206883
Desmapsamma anchorata: p2017007-06bis
RLU- Noise
[µg/ml]	Experiment 2			Experiment 3
100	1264791	1234816	1701419	895050	860464	895354
25	1363337	1590821	1566615	1429605	1350258	1350797
6.25	1367364	1513742	1737983	1401092	1582780	1722805
1.5625	1088544	1378261	1594177	1527330	1741804	1860665
0.390625	1158501	1509718	1806424	1647821	1756707	1763417
0.0976562	1132966	1500876	1388523	1651377	1543881	1481126
0.0244141	1123111	1443706	1196534	1273658	1405505	1312967
DMSO	1568027	1686934	1362213	1568027	1686934	1362213
ARAC
µg/ml	Experiment2
4.864	15651	-519	-6743
1.216	31823	14528	-5045
0.304	238064	233124	102503
0.076	1274061	1199628	1028025
0.019	1590529	1696596	1354999
0.00475	1344938	1332659	1337880
0.0011875	1756299	1367863	1482294
9e-05	3322481	3322128	3256654

## Sheet: RES259
p2017007-01 : Agelas clathrodes
RLU- Noise
[µg/ml]	Experiment 1			[µg/ml]	Experiment 2			Experiment 3
500	-8213.75	-9195.75	-8815.75	100	-39220.3	-38160.3	-36252.3	-34421.3	-33635.3	-33283.3
166.667	-7091.75	-6934.75	-6653.75	25	-32168.3	-27256.3	-22450.3	-16682.3	-13786.3	-12938.3
55.556	-5170.75	-5268.75	-3576.75	6.25	422387	734977	861757	1.17283e+06	1.16793e+06	1.12104e+06
18.519	-2827.75	-1532.75	3183.25	1.5625	1.47903e+06	2.22139e+06	2.33647e+06	2.47042e+06	2.53574e+06	2.58482e+06
6.173	14084.2	129622	24007.2	0.390625	2.27499e+06	2.78152e+06	2.78489e+06	2.95233e+06	2.84882e+06	3.06831e+06
2.058	996785	760569	1.27706e+06	0.0976562	2.24685e+06	2.72064e+06	2.86966e+06	2.78429e+06	2.8219e+06	2.79067e+06
0.21	2.46368e+06	1.62268e+06	2.49684e+06	0.0244141	2.0383e+06	2.6738e+06	2.67329e+06	2.72473e+06	2.74414e+06	2.84902e+06
0.021	2.63802e+06	2.98511e+06	2.80547e+06	DMSO	2.47111e+06	2.71622e+06	2.34703e+06	2.47111e+06	2.71622e+06	2.34703e+06
DMSO	2.52839e+06	2.43703e+06	2.74763e+06
p2017007-04: Verongula rigida
RLU- Noise
[µg/ml]	Experiment 1			[µg/ml]	Experiment 2			Experiment 3
500	-9484.75	-8757.75	-5608.75	100	-33616.3	-31941.3	-29504.3	17733.7	11746.7	-2904.33
166.667	-7194.75	-5747.75	2370.25	25	39996.7	73934.7	119556	1.89163e+06	1.52822e+06	1.06566e+06
55.556	2041.25	7240.25	38209.2	6.25	2.25679e+06	2.33605e+06	2.53588e+06	3.00513e+06	3.18455e+06	2.21563e+06
18.519	317879	320234	358359	1.5625	3.1532e+06	2.82493e+06	2.92573e+06	2.79968e+06	2.46962e+06	2.2609e+06
6.173	2.66496e+06	2.74829e+06	2.72213e+06	0.390625	2.996e+06	2.93189e+06	3.07783e+06	2.73902e+06	2.67516e+06	2.31746e+06
2.058	2.92301e+06	2.63447e+06	2.5452e+06	0.0976562	2.75608e+06	2.59028e+06	2.80801e+06	2.92614e+06	2.80693e+06	2.55714e+06
0.21	2.92706e+06	2.85063e+06	2.97684e+06	0.0244141	3.08535e+06	2.72857e+06	2.95838e+06	2.6968e+06	2.74119e+06	2.28238e+06
0.021	2.84049e+06	2.97171e+06	2.95107e+06	DMSO	2.48782e+06	2.45109e+06	2.55331e+06	2.48782e+06	2.45109e+06	2.55331e+06
DMSO	2.52839e+06	2.43703e+06	2.74763e+06
Desmapsamma anchorata: p2017007-06bis
RLU- Noise
[µg/ml]	Experiment 1			[µg/ml]	Experiment 2			Experiment 3
500	261588	221066		100	1501052	2334639	2505323	975379	1082410	1067447
166.667	2.4357e+06	2.55262e+06		25	2136304	2860505	2840440	2615204	2840898	2807597
55.556	2.61693e+06	2.68511e+06		6.25	2284944	2966307	2971289	2743627	2638223	2686686
18.519	2.8811e+06	2.57523e+06		1.5625	2228272	2764839	2929588	2795159	2990270	2856869
6.173	3.3565e+06	2.97798e+06		0.390625	1965528	2439052	2502975	2949343	2780720	2926636
2.058	2.85143e+06	2.59654e+06		0.0976562	2067159	2636464	2668545	2478914	2499828	2700895
0.21	2.95979e+06	2.92093e+06		0.0244141	2129552	2481102	2674129	2793774	2949848	2997846
0.021	2.9655e+06	2.79384e+06		DMSO	2244574	2435963	2338338	2244574	2435963	2338338
DMSO	2.52839e+06	2.43703e+06	2.74763e+06
ARAC
µg/ml	Experiment 1			µg/ml	Experiment 2
4.864	34957.2	34372.2		4.864	38899	29176	21870
1.6214	90427.2	114282		1.216	165235	140218	109503
0.540467	285357	254626		0.304	519114	506951	355088
0.180156	722437	486362		0.076	1555938	1568064	1208786
0.0600518	1.41038e+06	1.33387e+06		0.019	2388980	2294870	1934307
0.0200173	2.3484e+06	1.89506e+06		0.00475	2564616	2545224	2199801
0.00667243	2.59497e+06	2.40976e+06		0.0011875	2759765	2610160	2293356
0.00222414	2.79257e+06	2.32957e+06		DMSO	2560619	2728368	2561837
DMSO	2.78729e+06	2.74233e+06	2.54423e+06
